# Supplementary material for: Establishment of Quality Evaluation Method for Yinqiao Powder: A Herbal Formula against COVID‐19 in China
Source: Hindawi journal article supplement (doi:10.1155/2022/1748324), 2022-01-01
Supplement: f1 [file 1748324.f1.pdf]

## Supplementary Materials

**Table S1.** Information of the standard materials.

| Standard Materials    | Lot Number    | Content |
|-----------------------|---------------|---------|
| Caffeic acid          | 110885-200102 | 97.2%   |
| Phillyrin             | Z17A8X34077   | 98%     |
| Arctiin               | Z11D6B7394    | 98%     |
| Neochlorogenic acid   | P13O8F45676   | 98%     |
| Chlorogenic acid      | Y24J7K16726   | 98%     |
| Isochlorogenic acid A | Y24N8Y49009   | 98%     |
| Isochlorogenic acid C | P25J6F1794    | 98%     |
| Hesperidin            | 110721-201014 | 95.1%   |
| Rutin                 | 100080-201409 | 91.9%   |
| Liquiritin            | 111610-201106 | 93.7%   |
| Cynaroside            | 111720-201408 | 94.9%   |
| Forsythoside A        | 111810-201707 | 97.2%   |

**Table S2.** The KEGG enrichment results of Yinqiao powder in treating for COVID-19.

| GO       | Description                                          | Count | %     | LogP   |
|----------|------------------------------------------------------|-------|-------|--------|
| hsa05200 | Pathways in cancer                                   | 40    | 50.00 | -48.09 |
| hsa05417 | Lipid and atherosclerosis                            | 31    | 38.75 | -45.52 |
| hsa04933 | AGE-RAGE signaling pathway in diabetic complications | 23    | 28.75 | -38.45 |
| hsa05163 | Human cytomegalovirus infection                      | 24    | 30.00 | -31.56 |
| hsa05167 | Kaposi sarcoma-associated herpesvirus infection      | 22    | 27.50 | -29.47 |
| hsa04657 | IL-17 signaling pathway                              | 18    | 22.50 | -28.39 |
| hsa05205 | Proteoglycans in cancer                              | 21    | 26.25 | -27.14 |
| hsa05418 | Fluid shear stress and atherosclerosis               | 19    | 23.75 | -27.00 |
| hsa04668 | TNF signaling pathway                                | 18    | 22.50 | -26.91 |
| hsa05215 | Prostate cancer                                      | 17    | 21.25 | -26.09 |
| hsa05165 | Human papillomavirus infection                       | 23    | 28.75 | -25.83 |
| hsa05161 | Hepatitis B                                          | 19    | 23.75 | -25.67 |
| hsa05145 | Toxoplasmosis                                        | 17    | 21.25 | -24.95 |
| hsa05171 | Coronavirus disease - COVID-19                       | 20    | 25.00 | -24.28 |
| hsa05142 | Chagas disease                                       | 16    | 20.00 | -23.72 |
| hsa04151 | PI3K-Akt signaling pathway                           | 22    | 27.50 | -23.60 |
| hsa04066 | HIF-1 signaling pathway                              | 16    | 20.00 | -23.23 |
| hsa05164 | Influenza A                                          | 17    | 21.25 | -21.68 |
| hsa01521 | EGFR tyrosine kinase inhibitor resistance            | 14    | 17.50 | -21.56 |
| hsa05162 | Measles                                              | 16    | 20.00 | -21.46 |
| hsa05166 | Human T-cell leukemia virus 1 infection              | 18    | 22.50 | -21.33 |
| hsa05160 | Hepatitis C                                          | 16    | 20.00 | -20.58 |
| hsa05169 | Epstein-Barr virus infection                         | 17    | 21.25 | -20.42 |
| hsa05206 | MicroRNAs in cancer                                  | 19    | 23.75 | -20.21 |
| hsa01522 | Endocrine resistance                                 | 14    | 17.50 | -20.16 |
| hsa05225 | Hepatocellular carcinoma                             | 16    | 20.00 | -20.09 |

|          |                                                        |    |       |        |
|----------|--------------------------------------------------------|----|-------|--------|
| hsa05207 | Chemical carcinogenesis - receptor activation          | 17 | 21.25 | -20.06 |
| hsa05212 | Pancreatic cancer                                      | 13 | 16.25 | -19.82 |
| hsa05222 | Small cell lung cancer                                 | 13 | 16.25 | -18.67 |
| hsa04210 | Apoptosis                                              | 14 | 17.50 | -18.08 |
| hsa04620 | Toll-like receptor signaling pathway                   | 13 | 16.25 | -17.94 |
| hsa04625 | C-type lectin receptor signaling pathway               | 13 | 16.25 | -17.94 |
| hsa04936 | Alcoholic liver disease                                | 14 | 17.50 | -17.81 |
| hsa04010 | MAPK signaling pathway                                 | 17 | 21.25 | -17.63 |
| hsa04218 | Cellular senescence                                    | 14 | 17.50 | -17.22 |
| hsa05210 | Colorectal cancer                                      | 12 | 15.00 | -17.18 |
| hsa04071 | Sphingolipid signaling pathway                         | 13 | 16.25 | -17.15 |
| hsa04919 | Thyroid hormone signaling pathway                      | 13 | 16.25 | -17.05 |
| hsa05170 | Human immunodeficiency virus 1 infection               | 15 | 18.75 | -16.87 |
| hsa05022 | Pathways of neurodegeneration - multiple diseases      | 19 | 23.75 | -16.72 |
| hsa04926 | Relaxin signaling pathway                              | 13 | 16.25 | -16.68 |
| hsa04068 | FoxO signaling pathway                                 | 13 | 16.25 | -16.59 |
| hsa05208 | Chemical carcinogenesis - reactive oxygen species      | 15 | 18.75 | -16.54 |
| hsa04917 | Prolactin signaling pathway                            | 11 | 13.75 | -16.38 |
| hsa05152 | Tuberculosis                                           | 14 | 17.50 | -16.34 |
| hsa05135 | Yersinia infection                                     | 13 | 16.25 | -16.33 |
| hsa05146 | Amoebiasis                                             | 12 | 15.00 | -16.25 |
| hsa04621 | NOD-like receptor signaling pathway                    | 14 | 17.50 | -16.20 |
| hsa01524 | Platinum drug resistance                               | 11 | 13.75 | -16.16 |
| hsa04115 | p53 signaling pathway                                  | 11 | 13.75 | -16.16 |
| hsa04064 | NF-kappa B signaling pathway                           | 12 | 15.00 | -16.14 |
| hsa05214 | Glioma                                                 | 11 | 13.75 | -16.03 |
| hsa05220 | Chronic myeloid leukemia                               | 11 | 13.75 | -15.96 |
| hsa04062 | Chemokine signaling pathway                            | 14 | 17.50 | -15.94 |
| hsa04659 | Th17 cell differentiation                              | 12 | 15.00 | -15.94 |
| hsa05140 | Leishmaniasis                                          | 11 | 13.75 | -15.89 |
| hsa05131 | Shigellosis                                            | 15 | 18.75 | -15.88 |
| hsa05132 | Salmonella infection                                   | 15 | 18.75 | -15.83 |
| hsa04510 | Focal adhesion                                         | 14 | 17.50 | -15.66 |
| hsa04932 | Non-alcoholic fatty liver disease                      | 13 | 16.25 | -15.62 |
| hsa04370 | VEGF signaling pathway                                 | 10 | 12.50 | -15.27 |
| hsa05235 | PD-L1 expression and PD-1 checkpoint pathway in cancer | 11 | 13.75 | -15.17 |
| hsa04380 | Osteoclast differentiation                             | 12 | 15.00 | -15.03 |
| hsa05323 | Rheumatoid arthritis                                   | 11 | 13.75 | -14.95 |
| hsa05219 | Bladder cancer                                         | 9  | 11.25 | -14.88 |
| hsa05223 | Non-small cell lung cancer                             | 10 | 12.50 | -14.35 |
| hsa05130 | Pathogenic Escherichia coli infection                  | 13 | 16.25 | -14.25 |
| hsa05133 | Pertussis                                              | 10 | 12.50 | -14.10 |
| hsa04935 | Growth hormone synthesis, secretion and action         | 11 | 13.75 | -13.73 |
| hsa05213 | Endometrial cancer                                     | 9  | 11.25 | -13.41 |
| hsa05202 | Transcriptional misregulation in cancer                | 12 | 15.00 | -12.87 |
| hsa05224 | Breast cancer                                          | 11 | 13.75 | -12.71 |
| hsa04660 | T cell receptor signaling pathway                      | 10 | 12.50 | -12.69 |
| hsa05226 | Gastric cancer                                         | 11 | 13.75 | -12.64 |
| hsa05203 | Viral carcinogenesis                                   | 12 | 15.00 | -12.58 |
| hsa05218 | Melanoma                                               | 9  | 11.25 | -12.52 |
| hsa05020 | Prion disease                                          | 13 | 16.25 | -12.43 |
| hsa04915 | Estrogen signaling pathway                             | 10 | 12.50 | -11.45 |
| hsa04371 | Apelin signaling pathway                               | 10 | 12.50 | -11.41 |

|          |                                                               |    |       |        |
|----------|---------------------------------------------------------------|----|-------|--------|
| hsa04921 | Oxytocin signaling pathway                                    | 10 | 12.50 | -10.97 |
| hsa04931 | Insulin resistance                                            | 9  | 11.25 | -10.89 |
| hsa04630 | JAK-STAT signaling pathway                                    | 10 | 12.50 | -10.75 |
| hsa04726 | Serotonergic synapse                                          | 9  | 11.25 | -10.64 |
| hsa05010 | Alzheimer disease                                             | 13 | 16.25 | -10.57 |
| hsa05144 | Malaria                                                       | 7  | 8.75  | -10.20 |
| hsa04012 | ErbB signaling pathway                                        | 8  | 10.00 | -10.16 |
| hsa05231 | Choline metabolism in cancer                                  | 8  | 10.00 | -9.66  |
| hsa04215 | Apoptosis - multiple species                                  | 6  | 7.50  | -9.61  |
| hsa04061 | Viral protein interaction with cytokine and cytokine receptor | 8  | 10.00 | -9.59  |
| hsa04150 | mTOR signaling pathway                                        | 9  | 11.25 | -9.45  |
| hsa04928 | Parathyroid hormone synthesis, secretion and action           | 8  | 10.00 | -9.38  |
| hsa04664 | Fc epsilon RI signaling pathway                               | 7  | 8.75  | -9.22  |
| hsa04014 | Ras signaling pathway                                         | 10 | 12.50 | -9.22  |
| hsa05168 | Herpes simplex virus 1 infection                              | 13 | 16.25 | -9.21  |
| hsa05216 | Thyroid cancer                                                | 6  | 7.50  | -9.21  |
| hsa04725 | Cholinergic synapse                                           | 8  | 10.00 | -9.16  |
| hsa05230 | Central carbon metabolism in cancer                           | 7  | 8.75  | -9.13  |
| hsa04722 | Neurotrophin signaling pathway                                | 8  | 10.00 | -8.98  |
| hsa04662 | B cell receptor signaling pathway                             | 7  | 8.75  | -8.64  |
| hsa05014 | Amyotrophic lateral sclerosis                                 | 11 | 13.75 | -8.48  |
| hsa05415 | Diabetic cardiomyopathy                                       | 9  | 11.25 | -8.44  |
| hsa04140 | Autophagy-animal                                              | 8  | 10.00 | -8.39  |
| hsa04658 | Th1 and Th2 cell differentiation                              | 7  | 8.75  | -8.29  |
| hsa04912 | GnRH signaling pathway                                        | 7  | 8.75  | -8.26  |
| hsa04060 | Cytokine-cytokine receptor interaction                        | 10 | 12.50 | -8.21  |
| hsa05134 | Legionellosis                                                 | 6  | 7.50  | -8.03  |
| hsa04217 | Necroptosis                                                   | 8  | 10.00 | -7.98  |
| hsa05416 | Viral myocarditis                                             | 6  | 7.50  | -7.89  |
| hsa04929 | GnRH secretion                                                | 6  | 7.50  | -7.72  |
| hsa05321 | Inflammatory bowel disease                                    | 6  | 7.50  | -7.68  |
| hsa05221 | Acute myeloid leukemia                                        | 6  | 7.50  | -7.60  |
| hsa05211 | Renal cell carcinoma                                          | 6  | 7.50  | -7.52  |
| hsa04622 | RIG-I-like receptor signaling pathway                         | 6  | 7.50  | -7.49  |
| hsa05120 | Epithelial cell signaling in Helicobacter pylori infection    | 6  | 7.50  | -7.49  |
| hsa04611 | Platelet activation                                           | 7  | 8.75  | -7.39  |
| hsa04613 | Neutrophil extracellular trap formation                       | 8  | 10.00 | -7.38  |
| hsa04110 | Cell cycle                                                    | 7  | 8.75  | -7.34  |
| hsa05143 | African trypanosomiasis                                       | 5  | 6.25  | -7.33  |
| hsa04650 | Natural killer cell mediated cytotoxicity                     | 7  | 8.75  | -7.22  |
| hsa04728 | Dopaminergic synapse                                          | 7  | 8.75  | -7.20  |
| hsa04015 | Rap1 signaling pathway                                        | 8  | 10.00 | -7.04  |
| hsa04540 | Gap junction                                                  | 6  | 7.50  | -6.89  |
| hsa04723 | Retrograde endocannabinoid signaling                          | 7  | 8.75  | -6.86  |
| hsa04072 | Phospholipase D signaling pathway                             | 7  | 8.75  | -6.86  |
| hsa04211 | Longevity regulating pathway                                  | 6  | 7.50  | -6.86  |
| hsa04261 | Adrenergic signaling in cardiomyocytes                        | 7  | 8.75  | -6.82  |
| hsa04934 | Cushing syndrome                                              | 7  | 8.75  | -6.72  |
| hsa04666 | Fc gamma R-mediated phagocytosis                              | 6  | 7.50  | -6.63  |
| hsa04713 | Circadian entrainment                                         | 6  | 7.50  | -6.63  |
| hsa04916 | Melanogenesis                                                 | 6  | 7.50  | -6.53  |
| hsa04914 | Progesterone-mediated oocyte maturation                       | 6  | 7.50  | -6.50  |
| hsa05012 | Parkinson disease                                             | 8  | 10.00 | -6.26  |

|          |                                                           |   |      |       |
|----------|-----------------------------------------------------------|---|------|-------|
| hsa04720 | Long-term potentiation                                    | 5 | 6.25 | -6.01 |
| hsa05031 | Amphetamine addiction                                     | 5 | 6.25 | -5.95 |
| hsa04920 | Adipocytokine signaling pathway                           | 5 | 6.25 | -5.95 |
| hsa01523 | Antifolate resistance                                     | 4 | 5.00 | -5.93 |
| hsa04918 | Thyroid hormone synthesis                                 | 5 | 6.25 | -5.77 |
| hsa04550 | Signaling pathways regulating pluripotency of stem cells  | 6 | 7.50 | -5.64 |
| hsa04960 | Aldosterone-regulated sodium reabsorption                 | 4 | 5.00 | -5.55 |
| hsa04610 | Complement and coagulation cascades                       | 5 | 6.25 | -5.50 |
| hsa04020 | Calcium signaling pathway                                 | 7 | 8.75 | -5.45 |
| hsa04310 | Wnt signaling pathway                                     | 6 | 7.50 | -5.25 |
| hsa04672 | Intestinal immune network for IgA production              | 4 | 5.00 | -5.05 |
| hsa04961 | Endocrine and other factor-regulated calcium reabsorption | 4 | 5.00 | -4.92 |
| hsa04670 | Leukocyte transendothelial migration                      | 5 | 6.25 | -4.87 |
| hsa04724 | Glutamatergic synapse                                     | 5 | 6.25 | -4.87 |
| hsa04340 | Hedgehog signaling pathway                                | 4 | 5.00 | -4.82 |
| hsa04730 | Long-term depression                                      | 4 | 5.00 | -4.70 |
| hsa04213 | Longevity regulating pathway - multiple species           | 4 | 5.00 | -4.64 |
| hsa04114 | Oocyte meiosis                                            | 5 | 6.25 | -4.58 |
| hsa00220 | Arginine biosynthesis                                     | 3 | 3.75 | -4.58 |
| hsa04270 | Vascular smooth muscle contraction                        | 5 | 6.25 | -4.53 |
| hsa04910 | Insulin signaling pathway                                 | 5 | 6.25 | -4.49 |
| hsa04141 | Protein processing in endoplasmic reticulum               | 5 | 6.25 | -4.03 |
| hsa04350 | TGF-beta signaling pathway                                | 4 | 5.00 | -3.93 |
| hsa04750 | Inflammatory mediator regulation of TRP channels          | 4 | 5.00 | -3.86 |
| hsa05330 | Allograft rejection                                       | 3 | 3.75 | -3.85 |
| hsa05016 | Huntington disease                                        | 6 | 7.50 | -3.78 |
| hsa05332 | Graft-versus-host disease                                 | 3 | 3.75 | -3.72 |
| hsa04930 | Type II diabetes mellitus                                 | 3 | 3.75 | -3.60 |
| hsa04810 | Regulation of actin cytoskeleton                          | 5 | 6.25 | -3.54 |
| hsa04152 | AMPK signaling pathway                                    | 4 | 5.00 | -3.53 |
| hsa04024 | cAMP signaling pathway                                    | 5 | 6.25 | -3.51 |
| hsa04913 | Ovarian steroidogenesis                                   | 3 | 3.75 | -3.47 |
| hsa00330 | Arginine and proline metabolism                           | 3 | 3.75 | -3.47 |
| hsa04923 | Regulation of lipolysis in adipocytes                     | 3 | 3.75 | -3.35 |
| hsa04623 | Cytosolic DNA-sensing pathway                             | 3 | 3.75 | -3.20 |
| hsa05217 | Basal cell carcinoma                                      | 3 | 3.75 | -3.20 |
| hsa04390 | Hippo signaling pathway                                   | 4 | 5.00 | -3.09 |
| hsa05204 | Chemical carcinogenesis - DNA adducts                     | 3 | 3.75 | -3.08 |
| hsa04520 | Adherens junction                                         | 3 | 3.75 | -3.05 |
| hsa04137 | Mitophagy - animal                                        | 3 | 3.75 | -3.03 |
| hsa00982 | Drug metabolism - cytochrome P450                         | 3 | 3.75 | -3.03 |
| hsa04022 | cGMP-PKG signaling pathway                                | 4 | 5.00 | -2.99 |
| hsa04971 | Gastric acid secretion                                    | 3 | 3.75 | -2.96 |
| hsa04612 | Antigen processing and presentation                       | 3 | 3.75 | -2.93 |
| hsa00980 | Metabolism of xenobiotics by cytochrome P450              | 3 | 3.75 | -2.93 |
| hsa00983 | Drug metabolism - other enzymes                           | 3 | 3.75 | -2.90 |
| hsa04360 | Axon guidance                                             | 4 | 5.00 | -2.85 |
| hsa04911 | Insulin secretion                                         | 3 | 3.75 | -2.81 |
| hsa04727 | GABAergic synapse                                         | 3 | 3.75 | -2.76 |
| hsa04976 | Bile secretion                                            | 3 | 3.75 | -2.76 |
| hsa05410 | Hypertrophic cardiomyopathy                               | 3 | 3.75 | -2.75 |
| hsa05032 | Morphine addiction                                        | 3 | 3.75 | -2.74 |
| hsa04970 | Salivary secretion                                        | 3 | 3.75 | -2.72 |

|          |                                       |   |      |       |
|----------|---------------------------------------|---|------|-------|
| hsa05414 | Dilated cardiomyopathy                | 3 | 3.75 | -2.67 |
| hsa04070 | Phosphatidylinositol signaling system | 3 | 3.75 | -2.66 |
| hsa04925 | Aldosterone synthesis and secretion   | 3 | 3.75 | -2.64 |
| hsa04922 | Glucagon signaling pathway            | 3 | 3.75 | -2.54 |
| hsa05322 | Systemic lupus erythematosus          | 3 | 3.75 | -2.24 |
| hsa05017 | Spinocerebellar ataxia                | 3 | 3.75 | -2.18 |

**Table S3.** Similarity evaluation of 10 batches of Yinqiao powder.

|           | S1    | S2    | S3    | S4    | S5    | S6    | S7    | S8    | S9    | S10   | Reference |
|-----------|-------|-------|-------|-------|-------|-------|-------|-------|-------|-------|-----------|
| S1        | 1.000 | 0.983 | 0.976 | 0.973 | 0.983 | 0.993 | 0.993 | 0.977 | 0.994 | 0.984 | 0.990     |
| S2        | 0.983 | 1.000 | 0.987 | 0.986 | 0.983 | 0.993 | 0.993 | 0.994 | 0.996 | 0.987 | 0.994     |
| S3        | 0.976 | 0.987 | 1.000 | 0.999 | 0.996 | 0.993 | 0.993 | 0.992 | 0.988 | 0.995 | 0.996     |
| S4        | 0.973 | 0.986 | 0.999 | 1.000 | 0.994 | 0.991 | 0.991 | 0.992 | 0.986 | 0.994 | 0.995     |
| S5        | 0.983 | 0.983 | 0.996 | 0.994 | 1.000 | 0.993 | 0.993 | 0.988 | 0.989 | 0.998 | 0.996     |
| S6        | 0.993 | 0.993 | 0.993 | 0.991 | 0.993 | 1.000 | 1.000 | 0.993 | 0.998 | 0.994 | 0.999     |
| S7        | 0.993 | 0.993 | 0.993 | 0.991 | 0.993 | 1.000 | 1.000 | 0.993 | 0.998 | 0.994 | 0.999     |
| S8        | 0.977 | 0.994 | 0.992 | 0.992 | 0.988 | 0.993 | 0.993 | 1.000 | 0.992 | 0.990 | 0.995     |
| S9        | 0.994 | 0.996 | 0.988 | 0.986 | 0.989 | 0.998 | 0.998 | 0.992 | 1.000 | 0.990 | 0.997     |
| S10       | 0.984 | 0.987 | 0.995 | 0.994 | 0.998 | 0.994 | 0.994 | 0.990 | 0.990 | 1.000 | 0.997     |
| Reference | 0.990 | 0.994 | 0.996 | 0.995 | 0.996 | 0.999 | 0.999 | 0.995 | 0.997 | 0.997 | 1.000     |

**Table S4.** Relative retention time and RSD of common peaks.

|    | S1    | S2    | S3    | S4    | S5    | S6    | S7    | S8    | S9    | S10   | RSD/% |
|----|-------|-------|-------|-------|-------|-------|-------|-------|-------|-------|-------|
| 1  | 0.118 | 0.117 | 0.117 | 0.117 | 0.117 | 0.117 | 0.117 | 0.117 | 0.117 | 0.117 | 0.14  |
| 2  | 0.220 | 0.220 | 0.220 | 0.220 | 0.219 | 0.219 | 0.220 | 0.219 | 0.220 | 0.220 | 0.05  |
| 3  | 0.281 | 0.281 | 0.281 | 0.281 | 0.280 | 0.280 | 0.280 | 0.280 | 0.280 | 0.281 | 0.11  |
| 4  | 0.396 | 0.396 | 0.395 | 0.395 | 0.395 | 0.395 | 0.395 | 0.395 | 0.395 | 0.395 | 0.07  |
| 5  | 0.429 | 0.429 | 0.428 | 0.428 | 0.428 | 0.428 | 0.428 | 0.428 | 0.428 | 0.429 | 0.08  |
| 6  | 0.454 | 0.453 | 0.453 | 0.453 | 0.452 | 0.453 | 0.453 | 0.453 | 0.453 | 0.453 | 0.08  |
| 7  | 0.463 | 0.463 | 0.463 | 0.462 | 0.462 | 0.462 | 0.462 | 0.462 | 0.462 | 0.463 | 0.09  |
| 8  | 0.585 | 0.583 | 0.583 | 0.583 | 0.583 | 0.583 | 0.583 | 0.583 | 0.583 | 0.583 | 0.10  |
| 9  | 0.710 | 0.708 | 0.708 | 0.708 | 0.707 | 0.707 | 0.708 | 0.708 | 0.707 | 0.707 | 0.11  |
| 10 | 0.741 | 0.739 | 0.739 | 0.739 | 0.738 | 0.739 | 0.739 | 0.739 | 0.738 | 0.739 | 0.11  |
| 11 | 0.883 | 0.881 | 0.881 | 0.881 | 0.881 | 0.881 | 0.881 | 0.881 | 0.881 | 0.881 | 0.09  |
| 12 | 0.929 | 0.928 | 0.928 | 0.927 | 0.927 | 0.927 | 0.927 | 0.927 | 0.927 | 0.928 | 0.08  |
| 13 | 0.980 | 0.979 | 0.980 | 0.979 | 0.979 | 0.979 | 0.979 | 0.979 | 0.980 | 0.980 | 0.05  |
| 14 | 1.000 | 1.000 | 1.000 | 1.000 | 1.000 | 1.000 | 1.000 | 1.000 | 1.000 | 1.000 | 0.00  |
| 15 | 1.055 | 1.051 | 1.052 | 1.052 | 1.051 | 1.052 | 1.052 | 1.052 | 1.052 | 1.053 | 0.09  |
| 16 | 1.138 | 1.136 | 1.136 | 1.136 | 1.136 | 1.136 | 1.136 | 1.136 | 1.136 | 1.136 | 0.06  |
| 17 | 1.337 | 1.335 | 1.335 | 1.334 | 1.334 | 1.334 | 1.333 | 1.333 | 1.335 | 1.335 | 0.08  |
| 18 | 1.385 | 1.382 | 1.383 | 1.383 | 1.383 | 1.384 | 1.384 | 1.384 | 1.383 | 1.383 | 0.06  |
| 19 | 1.403 | 1.401 | 1.401 | 1.400 | 1.400 | 1.400 | 1.401 | 1.401 | 1.400 | 1.402 | 0.06  |

|    |       |       |       |       |       |       |       |       |       |       |      |
|----|-------|-------|-------|-------|-------|-------|-------|-------|-------|-------|------|
| 20 | 1.558 | 1.556 | 1.555 | 1.554 | 1.554 | 1.554 | 1.554 | 1.554 | 1.555 | 1.555 | 0.08 |
| 21 | 1.585 | 1.583 | 1.583 | 1.582 | 1.582 | 1.582 | 1.582 | 1.581 | 1.583 | 1.582 | 0.07 |
| 22 | 1.615 | 1.612 | 1.612 | 1.609 | 1.609 | 1.607 | 1.608 | 1.608 | 1.610 | 1.610 | 0.14 |
| 23 | 1.674 | 1.669 | 1.668 | 1.611 | 1.611 | 1.612 | 1.612 | 1.612 | 1.611 | 1.611 | 1.76 |
| 24 | 1.735 | 1.731 | 1.731 | 1.732 | 1.732 | 1.733 | 1.734 | 1.735 | 1.732 | 1.733 | 0.09 |
| 25 | 1.966 | 1.959 | 1.959 | 1.959 | 1.958 | 1.960 | 1.960 | 1.960 | 1.958 | 1.958 | 0.11 |
| 26 | 2.026 | 2.019 | 2.018 | 2.018 | 2.017 | 2.018 | 2.018 | 2.018 | 2.016 | 2.016 | 0.14 |
| 27 | 2.063 | 2.056 | 2.054 | 2.054 | 2.053 | 2.054 | 2.054 | 2.054 | 2.052 | 2.053 | 0.15 |
| 28 | 2.291 | 2.282 | 2.280 | 2.280 | 2.279 | 2.280 | 2.243 | 2.262 | 2.259 | 2.240 | 0.78 |
| 29 | 2.321 | 2.312 | 2.310 | 2.310 | 2.308 | 2.309 | 2.310 | 2.310 | 2.308 | 2.308 | 0.17 |

**Table S5.** Median retention time and average peak area of common peaks.

| NO. | $t_R$  | A      | NO. | $t_R$   | A      |
|-----|--------|--------|-----|---------|--------|
| 1   | 6.152  | 1.518  | 16  | 59.610  | 2.812  |
| 2   | 11.520 | 4.579  | 17  | 70.031  | 9.909  |
| 3   | 14.717 | 0.423  | 18  | 72.586  | 1.023  |
| 4   | 20.736 | 1.339  | 19  | 73.497  | 0.506  |
| 5   | 22.469 | 1.612  | 20  | 81.585  | 0.465  |
| 6   | 23.764 | 3.972  | 21  | 83.037  | 2.748  |
| 7   | 24.259 | 17.379 | 22  | 84.476  | 0.955  |
| 8   | 30.593 | 0.913  | 23  | 87.582  | 0.864  |
| 9   | 37.138 | 2.025  | 24  | 90.918  | 0.745  |
| 10  | 38.776 | 7.616  | 25  | 102.826 | 2.467  |
| 11  | 46.233 | 3.457  | 26  | 105.913 | 13.022 |
| 12  | 48.677 | 2.287  | 27  | 107.822 | 1.252  |
| 13  | 51.391 | 1.599  | 28  | 119.678 | 2.250  |
| 14  | 52.482 | 23.556 | 29  | 121.231 | 1.808  |
| 15  | 55.217 | 0.683  |     |         |        |

**Table S6.** Variance contribution rates of principal components.

| Component | Total                  | Variance%             | Cumulative% |
|-----------|------------------------|-----------------------|-------------|
| 1         | 13.667                 | 47.129                | 47.129      |
| 2         | 7.939                  | 27.375                | 74.504      |
| 3         | 2.900                  | 9.999                 | 84.503      |
| 4         | 2.170                  | 7.481                 | 91.984      |
| 5         | 1.126                  | 3.884                 | 95.868      |
| 6         | 0.659                  | 2.272                 | 98.140      |
| 7         | 0.333                  | 1.147                 | 99.286      |
| 8         | 0.186                  | 0.643                 | 99.929      |
| 9         | 0.021                  | 0.071                 | 100.000     |
| 10        | 8.678 E <sup>-16</sup> | 2.992E <sup>-15</sup> | 100.000     |

|    |                         |                        |         |
|----|-------------------------|------------------------|---------|
| 11 | 7.539 E <sup>-16</sup>  | 2.538E <sup>-15</sup>  | 100.000 |
| 12 | 5.302 E <sup>-16</sup>  | 1.828E <sup>-15</sup>  | 100.000 |
| 13 | 4.078 E <sup>-16</sup>  | 1.406E <sup>-15</sup>  | 100.000 |
| 14 | 2.943 E <sup>-16</sup>  | 1.015E <sup>-15</sup>  | 100.000 |
| 15 | 2.577 E <sup>-16</sup>  | 8.885E <sup>-16</sup>  | 100.000 |
| 16 | 1.898 E <sup>-16</sup>  | 6.546E <sup>-16</sup>  | 100.000 |
| 17 | 1.646 E <sup>-16</sup>  | 5.675E <sup>-16</sup>  | 100.000 |
| 18 | 9.243 E <sup>-17</sup>  | 3.187E <sup>-16</sup>  | 100.000 |
| 19 | 3.087 E <sup>-17</sup>  | 1.065E <sup>-16</sup>  | 100.000 |
| 20 | 2.802 E <sup>-18</sup>  | 9.663E <sup>-18</sup>  | 100.000 |
| 21 | -8.187 E <sup>-17</sup> | -2.823E <sup>-16</sup> | 100.000 |
| 22 | -1.154 E <sup>-16</sup> | -3.980E <sup>-16</sup> | 100.000 |
| 23 | -2.303 E <sup>-16</sup> | -7.943E <sup>-16</sup> | 100.000 |
| 24 | -2.586 E <sup>-16</sup> | -8.917E <sup>-16</sup> | 100.000 |
| 25 | -2.932 E <sup>-16</sup> | -1.011E <sup>-15</sup> | 100.000 |
| 26 | -4.315 E <sup>-16</sup> | -1.488E <sup>-15</sup> | 100.000 |
| 27 | -4.957 E <sup>-16</sup> | -1.709E <sup>-15</sup> | 100.000 |
| 28 | -6.745 E <sup>-16</sup> | -2.326E <sup>-15</sup> | 100.000 |
| 29 | -7.601 E <sup>-16</sup> | -2.621E <sup>-15</sup> | 100.000 |

**Table S7.** Results of method validation.

| Methodology   | 237 nm |              |           | 327 nm  |              |                |             |                |                |
|---------------|--------|--------------|-----------|---------|--------------|----------------|-------------|----------------|----------------|
|               | RSD/%  | Forsythoside | Phillyrin | Arctiin | Forsythoside | Neochlorogenic | Chlorogenic | Isochlorogenic | Isochlorogenic |
|               | A      |              |           | A       | acid         | acid           | acid A      | acid C         |                |
| Precision     | 1.40   | 1.70         | 1.48      | 1.36    | 1.42         | 1.36           | 1.34        | 1.54           |                |
| Stability     | 0.55   | 0.20         | 0.11      | 0.52    | 0.42         | 0.12           | 0.33        | 0.97           |                |
| Repeatability | 2.72   | 1.99         | 1.15      | 2.61    | 2.21         | 2.28           | 2.61        | 2.70           |                |
| Accuracy      | 98.31  | 98.58        | 99.73     | 96.32   | 101.44       | 99.67          | 101.79      | 99.44          |                |

**Table S8.** RCFs in different instruments and columns.

| Instrument     | Column                | RCF       |         |                |             |                |                |
|----------------|-----------------------|-----------|---------|----------------|-------------|----------------|----------------|
|                |                       | 237 nm    |         | 327 nm         |             |                |                |
|                |                       | Phillyrin | Arctiin | Neochlorogenic | Chlorogenic | Isochlorogenic | Isochlorogenic |
|                |                       |           |         | acid           | acid        | acid A         | acid C         |
| Thermo         | Hypersil ODS2         | 0.836     | 0.856   | 2.190          | 1.611       | 1.564          | 1.782          |
| UltiMate3000-1 | Thermo Synchronis C18 | 0.832     | 0.865   | 2.187          | 1.611       | 1.566          | 1.795          |
| Thermo         | Hypersil ODS2         | 0.838     | 0.867   | 2.187          | 1.614       | 1.566          | 1.795          |
| UltiMate3000-2 | Thermo Synchronis C18 | 0.839     | 0.856   | 2.186          | 1.612       | 1.564          | 1.776          |
|                | Mean                  | 0.836     | 0.861   | 2.188          | 1.612       | 1.565          | 1.787          |
|                | RSD                   | 0.37%     | 0.68%   | 0.08%          | 0.09%       | 0.07%          | 0.53%          |
